# Supplementary material for: Genome Mining of Plant NPFs Reveals Varying Conservation of Signature Motifs Associated With the Mechanism of Transport
Source: PubMed Central journal article supplement (PMC6288477; doi:10.3389/fpls.2018.01668), 2018-12-04

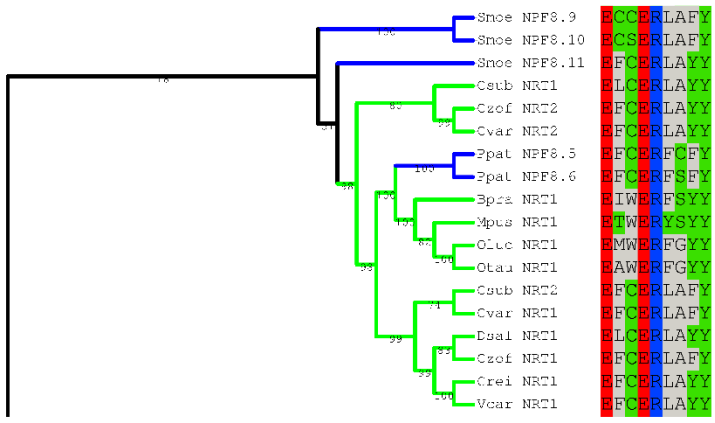

Supplement: Image_3.pdf [file Image_3.pdf]
