# Supplementary material for: Genome Mining of Plant NPFs Reveals Varying Conservation of Signature Motifs Associated With the Mechanism of Transport
Source: Front Plant Sci. 2018 Dec 4;9:1668. doi: 10.3389/fpls.2018.01668 (PMC6288477; doi:10.3389/fpls.2018.01668)
Supplement: Supplementary file 2 [file Table_2.XLSX]

## Sheet: Sheet1
Supplementary Table 2. Distribution of NPF genes in the eight subfamilies and conservation of the ExxER/K motif within genomes and subfamilies.
Genome	Abb.	NPF1	NPF2	NPF3	NPF4	NPF5	NPF6	NPF7	NPF8	Total	ExxER/K	ExxER/K (%)
Amborella trichopoda	Atri	1	2	2	4	10	4	2	5	30	22	0.733333
Ananas comosus	Acom	0	5	2	7	14	5	6	4	43	24	0.55814
Aquilegia coerulea	Acoe	6	7	3	12	9	5	3	6	51	30	0.588235
Arabidopsis lyrata	Al	3	11	1	8	15	4	3	5	50	31	0.62
Arabidopsis thaliana	At	3	14	1	7	15	4	3	5	52	31	0.596154
Arachis duranensis	Ad	7	10	3	10	15	7	4	7	63	37	0.587302
Brachypodium distachyon	Bd	2	5	4	10	19	7	11	16	74	37	0.5
Brassica rapa	Br	3	16	3	5	21	7	3	7	65	49	0.753846
Capsella rubella	Cr	3	12	1	5	15	4	3	5	48	34	0.708333
Carica papaya	Cp	3	12	2	6	10	7	3	4	47	32	0.680851
Cicer arietinum	Ca	5	10	4	6	7	3	4	4	43	28	0.651163
Citrus clementina	Cc	8	5	3	8	12	4	3	4	47	32	0.680851
Citrus sinensis	Csin	7	7	3	9	8	6	4	4	48	32	0.666667
Cucumis sativus	Csat	4	8	2	7	17	6	5	3	52	34	0.653846
Daucus carota	Dc	10	8	3	12	16	9	4	7	69	47	0.681159
Eucalyptus grandis	Eg	4	12	3	9	15	6	4	5	58	40	0.689655
Eutrema salsugineum	Es	2	9	1	7	14	4	3	4	44	29	0.659091
Fragaria vesca	Fv	1	11	2	7	16	3	4	7	51	28	0.54902
Glycine max	Gm	12	13	5	22	30	9	12	11	114	67	0.587719
Gossypium raimondii	Gr	6	10	4	12	12	11	6	8	69	45	0.652174
Linum usitatissimum	Lu	7	7	2	12	19	9	7	9	72	47	0.652778
Lotus japonicus	Lj	3	6	5	9	7	5	3	6	44	26	0.590909
Manihot esculenta	Me	5	11	5	9	15	8	5	5	63	46	0.730159
Marchantia polymorpha	Mp	0	0	1	6	3	7	3	1	21	12	0.571429
Medicago truncatula	Mt	12	13	4	14	29	9	8	3	92	53	0.576087
Mimulus guttatus	Mg	2	6	4	8	11	8	4	6	49	34	0.693878
Musa acuminata	Ma	1	10	2	11	13	13	9	7	66	40	0.606061
Oryza sativa	Os	3	6	5	9	13	6	10	18	70	34	0.485714
Phaseolus vulgaris	Pv	8	9	3	11	16	5	6	5	63	38	0.603175
Physcomitrella patens	Ppat	0	0	1	3	7	3	3	3	20	12	0.6
Populus trichocarpa	Pt	15	8	4	10	24	6	5	7	79	57	0.721519
Prunus persica	Pp	2	14	1	8	11	5	5	5	51	28	0.54902
Ricinus communis	Rc	4	12	2	5	9	5	2	4	43	31	0.72093
Selaginella moellendorffii	Sm	0	0	4	3	7	5	11	7	37	19	0.513514
Setaria italica	Si	3	10	7	12	16	6	11	17	82	36	0.439024
Solanum lycopersicum	Sl	19	13	2	12	8	10	6	7	77	44	0.571429
Solanum tuberosum	St	15	11	2	12	8	10	4	8	70	44	0.628571
Sorghum bicolor	Sb	3	7	7	15	12	6	9	15	74	36	0.486486
Theobroma cacao	Tc	4	10	3	8	12	6	4	5	52	35	0.673077
Vitis vinifera	Vv	4	6	2	7	18	6	3	3	49	32	0.653061
Zea mays	Zm	4	4	5	7	14	8	10	12	64	37	0.578125
Zostera marina	Zmar	0	2	1	3	5	4	4	8	27	19	0.703704
		NPF1	NPF2	NPF3	NPF4	NPF5	NPF6	NPF7	NPF8	2383	1469	0.61645
total per subfamily		204	352	124	367	567	265	222	282	2383
ExxER/K		147	248	124	0	464	265	0	221	1469
%ExxER/K		0.720588	0.704545	1	0	0.818342	1	0	0.783688	0.61645
The number of NPFs belonging to each of the eight subfamilies is shown for each genome.
A green color scale was used to represent the abundance of NPFs, with darker green cells representing subfamilies or genomes with more NPFs.
The conservation of the ExxER/K motif is shown for each subfamily and each genome.
A red color scale was used to represent the conservation of the motif, with darker red cells representing the subfamilies or genomes with more conserved motif.
KW/AB
		555.721
	Brapa#Bra007050
	AT1G32450
			RLGNSCILLIMISGMERFAYKGVASNLITYLTDVV
